# Supplementary material for: Amino- and polyaminophthalazin-1(2H)-ones: synthesis, coordination properties, and biological activity
Source: publisher site journal article supplement (doi:10.3762/bjoc.17.50), 2021-02-25
Supplement: Additional file 2 [file 1860-5397-17-50-S2.pdf]

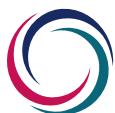

## Supporting Information

for

### **Amino- and polyaminophthalazin-1(2*H*)-ones: synthesis, coordination properties, and biological activity**

Zbigniew Malinowski, Emilia Fornal, Agata Sumara, Renata Kontek, Karol Bukowski, Beata Pasternak, Dariusz Sroczyński, Joachim Kusz, Magdalena Małecka and Monika Nowak

*Beilstein J. Org. Chem.* **2021**, *17*, 558–568. doi:10.3762/bjoc.17.50

**Experimental details, computational details, X-ray crystallographic data, FTIR and vis–NIR spectra, and cyclic voltammetry for compounds 7 and 17**

## Table of Contents

|    |                                     |     |
|----|-------------------------------------|-----|
| 1. | General information.....            | S2  |
| 2. | Synthesis.....                      | S4  |
| 3. | Crystallography .....               | S5  |
| 4. | FTIR and Vis-NIR spectroscopy ..... | S11 |
| 5. | Cyclic voltammetry .....            | S17 |
| 3. | References.....                     | S18 |

## 1. General information

X-Ray data for complex **17** were measured using an Agilent SuperNova diffractometer with an Atlas detector at  $T = 100(2)$  K with monochromatic MoK $\alpha$  radiation ( $\lambda = 0.71073$  Å). Multi-scan absorption correction was applied for all data [1]. All structures were solved by direct methods using SHELX and further refined on  $F^2$  using SHELXL-2014/7 [2].

The FTIR spectrum was recorded from a KBr pellet in the range of 4000–400  $\text{cm}^{-1}$  with an optical resolution of 4  $\text{cm}^{-1}$  using a Nexus FTIR spectrometer (Thermo Nicolet Co., USA).

Vis-NIR spectra were recorded in methanol in the wavelength range of 380–880 nm in a quartz cuvette with the optical path length of 1.0 cm with a Jasco V-630 UV/VIS/NIR spectrophotometer (Jasco Inc., USA).

The cyclic voltammetry measurements were performed in methanol using the three-electrode system with a platinum disk as a working electrode, a platinum gauze as a counter electrode, and a saturated calomel electrode (SCE) as the reference electrode in which the inner solution of KCl was replaced with a saturated NaCl solution to avoid the precipitation of KClO<sub>4</sub> in the frit. The electrochemical cell was connected to the potentiostat PGSTAT10 Autolab controlled with GPES v. 4.9 software (both from Eco Chemie BV, The Netherlands). Tetraethylammonium chlorate(VII) was used as a supporting electrolyte, and before each measurement the tested solution was purged with nitrogen gas.

The geometry of complex **17** was fully optimized in vacuum using the DFT method with its crystal structure coordinates as the input geometry. The subsequent vibrational analysis has proved that the stationary point on the potential energy surface was found since no negative frequencies were detected. The calculated vibrational modes were

identified using the Vibrations extension of the Avogadro software [3], and they were scaled with a factor of 0.9688 [4]. The CAM-B3LYP hybrid exchange–correlation functional with the long-range correction was applied [5], and to take into account the relativistic effects, the Lanl2DZ effective core potential basis set [6] was used for the Cu atom, and the standard all-electron 6-311++(d,p) basis set was chosen for H, C, N, O, and Cl atoms (hereafter denoted as 6-311++(d,p)/Lanl2DZ(Cu)). After full geometry reoptimization of complex **17** in implicit methanol solvent, its vis-NIR spectrum was simulated using the TD-DFT method through the calculation of the vertical transition energies to the first 30 low-lying singlet excited states in methanol as well. The implicit methanol environment in the DFT and TD-DFT calculations was approximated using the Integral Equation Formalism of the Polarizable Continuum Model (IEFPCM) [7]. The atomic orbital contributions to molecular orbitals were calculated using the AllOrbitals option of the Gaussian Population keyword. All DFT and TD-DFT calculations were performed using Gaussian 09 (Rev. D.01) package [8]. Potassium bromide, copper(II) chloride dihydrate, tetraethylammonium chlorate(VII), and methanol were purchased from Sigma-Aldrich or Chempur (Poland) and used without further purification.

## 2. Synthesis

### 2.1 Synthesis of 2-[2-(Dimethylamino)ethyl]-6-methoxy-4-(pyridin-2-yl)phthalazin-1(2*H*)-one (**7**)

Compound **7** (yellow solid; yield 64%.) was synthesized according to the procedure described in our previous report [9]. The  $^1\text{H}$ ,  $^{13}\text{C}$  NMR and FTIR data are in agreement with those reported in the literature [9].

### 2.2 Synthesis of complex **17**

A solution of  $\text{CuCl}_2 \cdot 2\text{H}_2\text{O}$  (0.0171 g, 0.1 mmol) in methanol (20 mL) was added dropwise to a stirred solution of phthalazinone derivative **7** (0.0324 g, 0.1 mmol) in methanol (50 mL). The stirring was continued at ambient temperature for 4 h and after this time solution was allowed at this temperature to a very slow evaporation of the solvent (ca. two weeks). In this way the light green crystals suitable for X-ray analysis were obtained. Yield: 0.0298 g, 65%. FT-IR (KBr):  $\nu = 3439, 3075, 1660, 1608, 1578, 1531, 1472, 1382, 1331, 1289, 1241 \text{ cm}^{-1}$ . Vis-NIR (methanol):  $\lambda_{\text{max}} = 710 \text{ nm}$ ,  $\varepsilon = 3067 \text{ dm}^3 / (\text{mol cm})$ .

### 3. Crystallography

All non-hydrogen atoms were refined anisotropically. The positions of hydrogen atoms were calculated from the known geometry (C–H bond lengths at 0.95, 0.98, and 0.99 Å for aromatic CH, methyl Me, and methylene CH<sub>2</sub> atoms, respectively) and treated as riding where the isotropic thermal parameters of these hydrogen atoms were fixed as  $U_{\text{iso}}(\text{H}) = 1.5U_{\text{eq}}(\text{C})$  for H atoms from methyl group and  $U_{\text{iso}}(\text{H}) = 1.2U_{\text{eq}}(\text{C})$  for all remaining atoms.

#### 3.1 X-Ray single-crystal structure of complex **17**.

**Table S1:** Experimental and theoretical parameters for molecules A and B of complex **17**.

|            |                  | Exp.       | Calc. <sup>a</sup> |
|------------|------------------|------------|--------------------|
| Molecule A | Bond lengths (Å) |            |                    |
|            | Cu1-Cl1          | 2.2905(17) | 2.39417            |
|            | Cu1-Cl2          | 2.4175(19) | 2.34360            |
|            | Cu1-N1           | 2.176(5)   | 2.39417            |
|            | Cu1-N3           | 1.995(5)   | 2.07000            |
|            | Cu1-N4           | 2.008(5)   | 2.14137            |
|            | Bond angels (°)  |            |                    |
|            | Cl1-Cu1-Cl2      | 117.2(2)   | 146.36652          |
|            | Cl1-Cu1-N1       | 143.7(2)   | 105.32247          |
|            | Cl1-Cu1-N3       | 92.8(2)    | 91.08575           |
|            | Cl1-Cu1-N4       | 93.4(2)    | 96.35414           |

|            |          |           |
|------------|----------|-----------|
| Cl2-Cu1-N1 | 97.6(2)  | 107.02706 |
| Cl2-Cu1-N3 | 86.7(2)  | 88.98975  |
| Cl2-Cu1-N4 | 97.0(2)  | 94.79740  |
| N1-Cu1-N3  | 78.6(2)  | 74.22834  |
| N1-Cu1-N4  | 92.1(2)  | 86.05216  |
| N3-Cu1-N4  | 170.4(2) | 160.15522 |

---

Molecule B

Bond lengths (Å)

|         |            |         |
|---------|------------|---------|
| Cu2-Cl3 | 2.2838(17) | 2.28783 |
| Cu2-Cl4 | 2.4250(17) | 2.31713 |
| Cu2-N5  | 2.005(5)   | 2.05167 |
| Cu2-N6  | 2.025(5)   | 2.10403 |
| Cu2-N7  | 2.178(5)   | 2.36625 |

---

Bond angels (°)

|             |          |           |
|-------------|----------|-----------|
| N6-Cu2-N7   | 91.0(2)  | 86.11765  |
| Cl3-Cu2-N5  | 94.2(2)  | 90.39575  |
| Cl3-Cu2-N6  | 93.5(2)  | 96.58238  |
| Cl3-Cu2-N7  | 143.8(2) | 103.21391 |
| Cl4-Cu2-N5  | 89.0(2)  | 88.78492  |
| Cl4-Cu2-N6  | 95.5(2)  | 94.93956  |
| Cl4-Cu2-N7  | 102.3(2) | 108.31446 |
| Cl3-Cu2-Cl4 | 113.0(2) | 147.02828 |
| N5-Cu2-N7   | 78.0(2)  | 74.70961  |

|           |          |           |
|-----------|----------|-----------|
| N5-Cu2-N6 | 168.8(2) | 160.65503 |
|-----------|----------|-----------|

<sup>a</sup>Theoretical geometrical parameters were calculated at the CAM-B3LYP/6-311++G(d,p)/LanL2DZ(Cu) level of theory in vacuum.

The calculated five-coordinate geometry index  $\tau_5 = (\beta - \alpha)/60^\circ$  [10], where  $\beta$  and  $\alpha$  are two greatest bond angles X–M–Y (X, Y = donor atoms of ligand), for the CuN<sub>3</sub>Cl<sub>2</sub> coordination center of molecules A and B is equal to 0.45 ( $\beta(\text{N3-Cu1-N4}) = 170.4^\circ$ ,  $\alpha(\text{Cl1-Cu1-N1}) = 143.7^\circ$ ) and 0.42 ( $\beta(\text{N5-Cu2-N6}) = 168.8^\circ$ ,  $\alpha(\text{Cl3-Cu2-N7}) = 143.8^\circ$ ), respectively. Since the calculated  $\tau_5$  are almost in the middle of the range for an ideal square pyramid ( $\tau_5 = 0.0$ ) and for an ideal trigonal bipyramid ( $\tau_5 = 1.0$ ), the geometry of the CuN<sub>3</sub>Cl<sub>2</sub> coordination center of the complex **17** can be considered as the strongly distorted square pyramidal. The basal plane of the square-pyramid is formed by N1, N3, N4, and Cl1 atoms in the molecule A, and by N5, N6, N7, and Cl3 atoms in the molecule B, and the apex positions are occupied by Cl2 and Cl4 anions, respectively. In molecule A the Cl1 anion is deviated from the plane formed by N1, N3 and N4 atoms by 1.253 Å, and in molecule B the Cl3 atom is deviated from the plane formed by N5, N6 and N7 atoms by 1.257 Å. In both molecules A and B the axial Cu-Cl distances, Cu1-Cl2 = 2.4175(19) Å and Cu2-Cl4 = 2.4250(17) Å, are longer than the equatorial Cu-Cl distances, Cu1-Cl1 = 2.2905(17) Å and Cu2-Cl3 = 2.2838(17) Å, and the corresponding Cu-N bond lengths follow the same order Cu-N<sub>azomethine</sub> > Cu-NMe<sub>2</sub> > Cu-N(2Py). In molecules A and B the corresponding N-Cu-N, N-Cu-Cl, and Cl-Cu-Cl bond angles also display a high similarity as their differences are in the range of 0.6–1.6, 0.1–4.7, and equal to 4.2°, respectively.

The crystal structure of the complex **17** is stabilized with a 3D intermolecular hydrogen bond network (Figure S1a). In this hydrogen bond system the aliphatic (H13A, H15C, and H36B) or aromatic (H2, H10, and H26) hydrogen atoms act as proton donors,



whereas the chloride ligands (Cl1 and Cl3) and methoxy (O3) and carbonyl (O4) oxygen atoms function as proton acceptors. These weak C–H...O and C–H...Cl hydrogen bonds are characterized by the H...A lengths in the range of 2.40–2.59 and 2.73–2.82 Å, respectively (Table S2). They also display a middle donor directionality, i.e., preference for linearity, as their bond angles are in the range of 147–174° as expected for hydrogen-bond donors with a middle electronegativity [11].

Complex **17** in a solid state is also stabilized by  $\pi$ – $\pi$  stacking interactions between the 1,2-diazine moieties and the pyridin-2-yl substituents of the ligands (Figure S1b). The calculated Cg1...Cg3 and Cg2...Cg4 distances between the corresponding centroids are equal to 3.589(2) and 3.536(2) Å, respectively. The moieties defining the Cg1...Cg3 and Cg2...Cg4 interactions adopt slightly parallel-displaced and sandwich conformations, respectively, and they are almost parallel as the dihedral angles between their calculated mean planes are equal to 3.48 and 1.48°, respectively. The experimental and calculated bond lengths and angles of the CuN<sub>3</sub>Cl<sub>2</sub> coordination center of complex **17** are compared in Table S1. In general, the calculated Cu–N and Cu–Cl bond lengths in molecules A and B are overestimated by 0.08–0.22 and 0.05–0.19 Å, respectively, except for the Cu1–Cl2 and Cu2–Cl4 bonds which are underestimated by 0.07 and 0.11 Å, respectively. On the other hand, the calculated the N–Cu–N, N–Cu–Cl, and Cl–Cu–Cl bond angles are overestimated or underestimated, however, the largest deviation from the experimental values display the Cl1–Cu1–N1 and Cl3–Cu2–N7 bond angles which differ by 38.4 and 40.6°, respectively. This can be explained by the fact that in the solid state the Cl1 and Cl3 atoms are involved in intramolecular hydrogen bonding (Figure S1a) which significantly affects the geometry of the coordination center and these interactions were not included in the DFT calculations in vacuum.

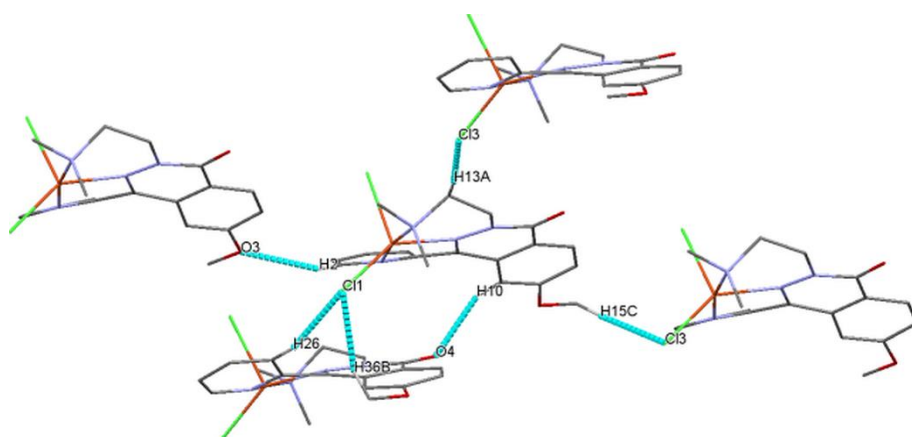

a)

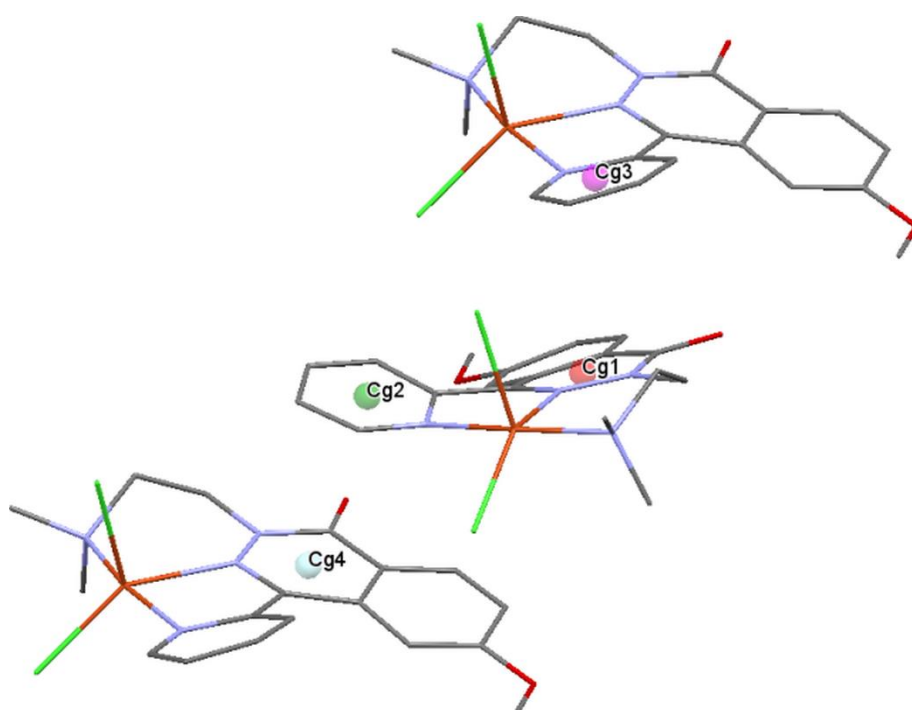

b)

**Figure S1:** Molecular packing of complex **17**: a) partial molecular packing of complex **17** showing 3D network of hydrogen bonds b)  $\pi\cdots\pi$  interaction between rings; Cg1-centroid of the N1/N2/C3/C5/C6/C1 ring, Cg2-centroid of the N3/C2/C14/C8/C7/C4 ring, Cg3-centroid of the N5/C20/C26/C27/C35/C25 ring, and Cg4-centroid of the N7/N8/C23/C22/C21/C19 ring.

**Table S2:** Hydrogen bond geometry in complex **17** (Å, °).

| D-H...A                       | D-H  | H...A | D...A    | <D-H...A |
|-------------------------------|------|-------|----------|----------|
| C2-H2...O3 <sup>i</sup>       | 0.95 | 2.59  | 3.424(8) | 147      |
| C10-H10...O4                  | 0.95 | 2.40  | 3.290(7) | 155      |
| C13-H13A...Cl3 <sup>ii</sup>  | 0.99 | 2.82  | 3.811(7) | 174      |
| C15-H15C...Cl3 <sup>iii</sup> | 0.98 | 2.81  | 3.782(8) | 172      |
| C26-H26...Cl1                 | 0.95 | 2.82  | 3.739(6) | 163      |
| C36-H36B...Cl1                | 0.98 | 2.73  | 3.622(7) | 152      |

symmetry code: <sup>i</sup> x, -y, 1/2+z, <sup>ii</sup> 1+x,-1+y, z, <sup>iii</sup> 1+x,1-y,-1/2+z.

## 4. FTIR and vis-NIR Spectroscopy

### 4.1 FTIR Spectroscopy

The experimental FTIR spectrum of complex **17** was recorded in KBr to confirm a participation of nitrogen atoms of the pyridin-2-yl substituent, 1,2-diazine moiety, and 2-(dimethylamino)ethyl group in a coordination of the copper(II) center (Figure S2). For this purpose, and as the most informative feature, the frequencies of the stretching vibrations of the C-N bond of the pyridin-2-yl substituent, the C=N and N-N bonds of the 1,2-diazine moiety, and the N-Me bond of the 2-(dimethylamino)ethyl group both in the free ligand **7** and its complex with copper(II) were compared (Table S3). The experimental IR absorption bands were assigned based on the theoretical vibrational modes calculated at the CAM-B3LYP/6-311++G(d,p)/LanL2DZ(Cu) level of theory for molecule A of complex **17** in vacuum (Figure S3). In particular, the  $\nu_{2\text{Py}}(\text{C-N})$ ,  $\nu(\text{C=N})$ ,  $\nu(\text{N-N})$ , and  $\nu(\text{N-Me})$  frequencies for complex **17** were calculated at 1569, 1550, 1211, and 1230  $\text{cm}^{-1}$ , respectively, and then they were assigned to the experimental IR absorption bands at 1578, 1531, 1241, and 1241  $\text{cm}^{-1}$ , respectively. In the case of the free compound **7**, the stretching frequencies of the  $2\text{Py}(\text{C-N})$ , C=N, N-N, and N-Me bonds were previously allocated at 1586, 1536, 1274, and 1279  $\text{cm}^{-1}$ , respectively [12]. Thus, the observed downshift of the stretching frequencies of the mentioned bonds in complex **17**, compared with those in the free phthalazinone **7**, clearly corroborates the coordination of the copper(II) central ion through nitrogen atoms of the pyridin-2-yl substituent, 1,2-diazine moiety, and 2-(dimethylamino)ethyl group. The analogous lowering of the stretching frequencies of the C-N bond in pyridin-2-yl group and the azomethine C=N bonds in ligands as a result of coordination to copper(II) central ion were observed early [13-15]. Moreover, in the experimental IR spectrum of complex **17** no Cu-N stretching vibrational modes were detected since they occur in the far-

infrared part of the spectrum below  $300\text{ cm}^{-1}$  [16]. However, the calculated frequencies of the Cu-N=C, Cu-N<sub>2</sub>Py, and Cu-NMe stretching vibrations were found at 157, 172, and  $270\text{ cm}^{-1}$ , respectively.

**Table S3:** Comparison of selected experimental and calculated stretching frequencies of ligand **7** and its copper(II) complex **17**.

|          | Phthalazinone <b>7</b> <sup>a</sup>                    | Complex <b>17</b>                                        |
|----------|--------------------------------------------------------|----------------------------------------------------------|
|          | $\nu_{\text{exp}}, \nu_{\text{calc}} (\text{cm}^{-1})$ | $\nu_{\text{exp}}, \nu_{\text{calc}}^c (\text{cm}^{-1})$ |
| 2Py(C-N) | 1586, 1578                                             | 1578, 1569                                               |
| C=N      | 1536, 1517                                             | 1531, 1550                                               |
| N-N      | 1274, 1216                                             | 1241, 1211                                               |
| N-Me     | 1279, 1257                                             | 1241, 1230                                               |

<sup>a</sup>Data from [12]. <sup>b</sup>In KBr. <sup>c</sup>Calculated at the CAM-B3LYP/6-311++G(d,p)/LanL2DZ(Cu) level of theory in vacuum and scaled with a factor of 0.9688 [4].

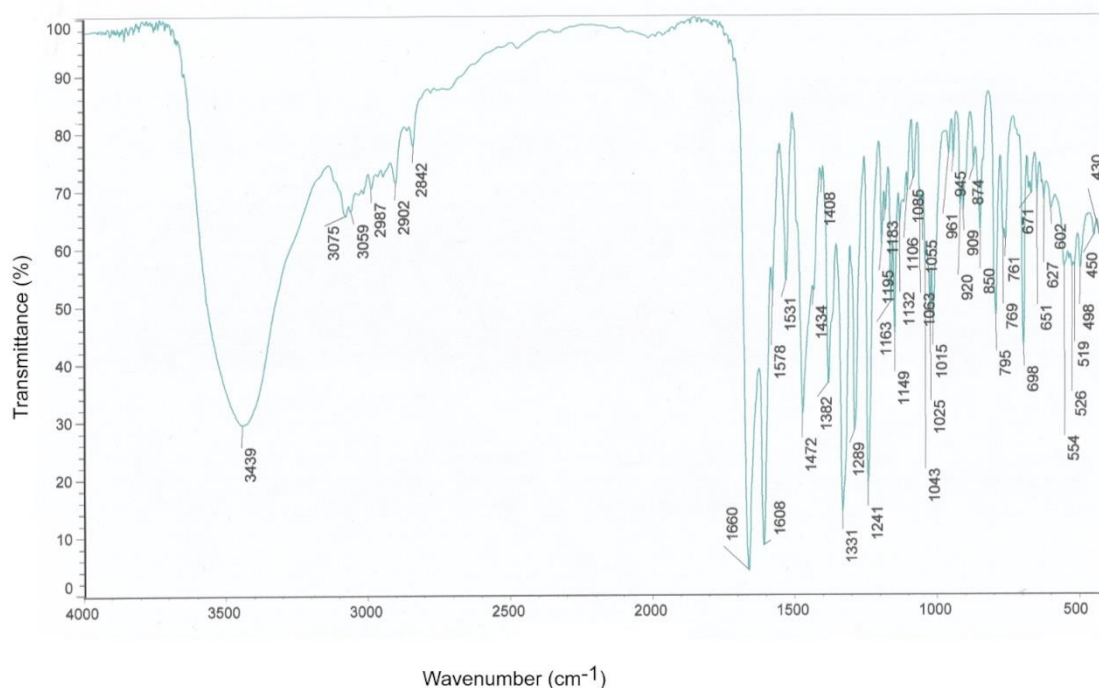

**Figure S2:** The experimental FTIR spectrum of complex **17** (KBr).

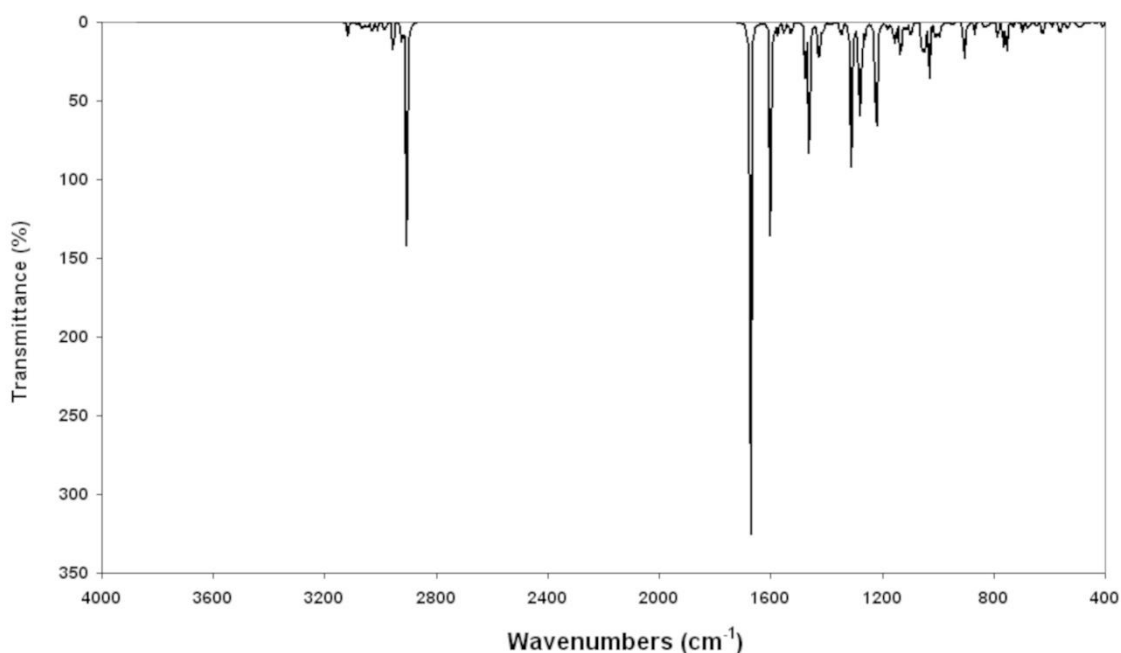

**Figure S3:** Theoretical vibrational modes calculated at the CAM-B3LYP/6–311++G(d,p)/LanL2DZ(Cu) level of theory for molecule A of complex **17** in vacuum.

#### 4.2 Vis-NIR Spectroscopy

Compound **7** in methanol is not spectroscopically active in the visible region of the electronic spectrum. However, it strongly absorbs in the UV region at wavelengths of 232, 253, and 301 nm [12]. On the other hand, in the vis-NIR spectrum of complex **17** in the same solvent the new absorption bands can be found at 710, 505, 429, and 416 nm (Figure S4, black line). For a detailed analysis of electronic excitations in complex **17**, TD-DFT simulation was performed at the CAM-B3LYP/6–311++G(d,p)/LanL2DZ(Cu) level of theory for molecule A of complex **17** in implicit methanolic environment approximated with the IEF-PCM solvation method (Figure S4, red line). Additionally, the atomic orbital contributions to the molecular orbitals involved in electronic transitions were also calculated.

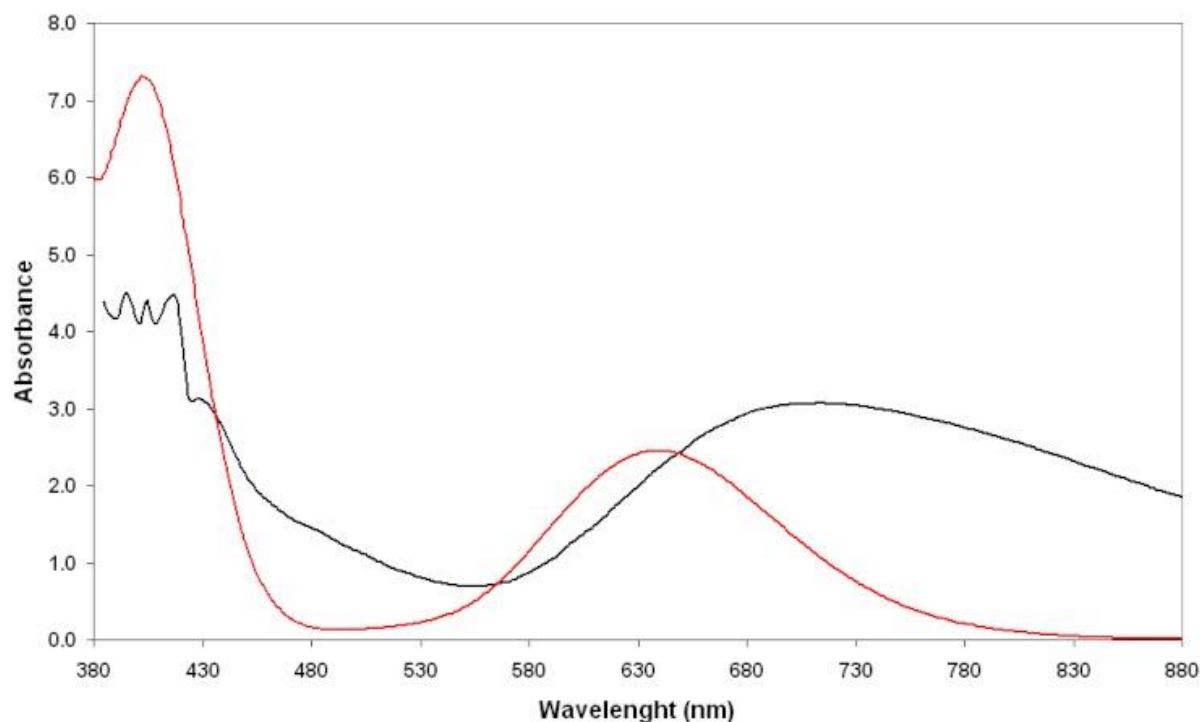

**Figure S4:** Experimental vis-NIR spectrum of complex **17** in methanol (0.001 mol/dm<sup>3</sup>, optical length of 1.0 cm, black line) and theoretical vis-NIR spectrum of complex **17** (red line) calculated at the CAM-B3LYP/6–311++G(d,p)/LanL2DZ(Cu) level of theory in methanol using IEF-PCM solvation model.

The results from TD-DFT calculations given in Table S4 clearly show that the longwave experimental electronic transition at 710 nm can be assigned to the calculated electronic transitions at 649 and 638 nm which mainly display the *d–d* character with some contribution of the MLCT transition type. A similar spectroscopic behavior has been observed in the case of the Cu(II) complex with *N*-methyl-*N*-((6-pivaloylamido-2-pyridyl)-methyl)-*N*-(2-pyridylethyl)amine in methanol with the same coordinate center CuN<sub>3</sub>Cl<sub>2</sub> and very similar  $\tau_5$  of 0.46 whose longwave *d–d* absorption band could be found at 655 nm [17]. The shortwave absorption bands at 429 and 416 nm were assigned to the theoretical absorption bands at 414, 407, 403, and 392 nm, and taking into account the position of the atomic orbitals which contribute to the ground and

excited states molecular orbitals, these electronic excitations can be denoted as LMCT and ILCT transitions, except that at 392 nm which can be described as a pure LMCT transition. Finally, there is the experimental absorption band at 505 nm which was assigned to the calculated electronic transition at 517 nm, and can be characterized as a pure ILCT state. Moreover, to determine the stoichiometry of complex **17** in methanol solution, the vis-NIR spectra of a series of solutions with an increasing molar ratio of **7** to Cu(II) from 0.0 to 5.0 were recorded (Figure S5). It was found that the absorbance at 710 nm of these solutions reached a clear plateau at a L3:Cu(II) = 1:1 molar ratio, and thus, one can conclude that complex **17** in methanol exhibits the 1:1 metal to ligand stoichiometry.

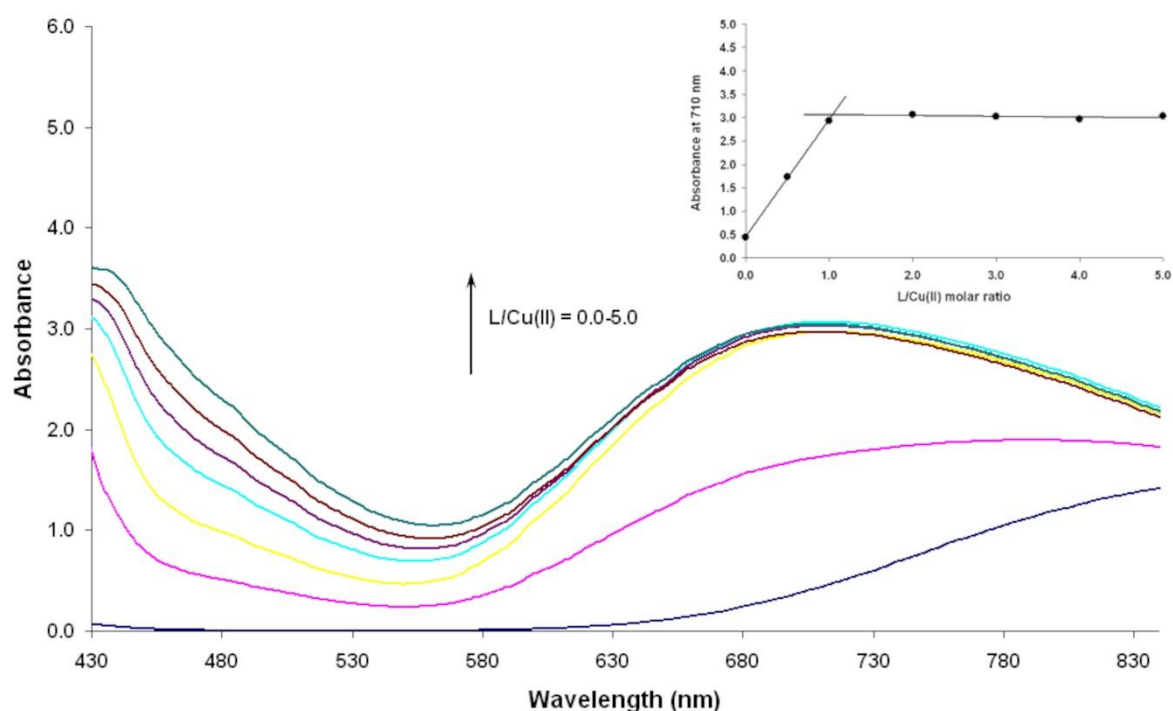

**Figure S5:** Vis-NIR spectra of a series of solutions with an increasing molar ratio of **7** to Cu(II) from 0.0 to 5.0.



**Table S4:** Experimental and theoretical spectroscopic parameters of the electronic transitions in complex **17**.

| $\lambda_{\text{exp}}^{\text{a}}$ | $\lambda_{\text{calc}}^{\text{b}}$ | $f^{\text{c}}$ | Main contribution <sup>d</sup>                                                                                                                                     | Assignment                  |
|-----------------------------------|------------------------------------|----------------|--------------------------------------------------------------------------------------------------------------------------------------------------------------------|-----------------------------|
| 710                               | 649                                | 0.0002         | HOMO $\beta$ –23 ( $d(\text{Cu1}) = 44\%$ ) $\rightarrow$<br>LUMO $\beta$ ( $d(\text{Cu1}) = 58\%$ ; $p(\text{Cl2}) = 19\%$ )<br>[31%]                             | $d \rightarrow d$ ,<br>MLCT |
|                                   | 638                                | 0.0036         | HOMO $\beta$ –28 ( $d(\text{Cu1}) = 31\%$ ; $p(\text{C25}) = 13\%$ )<br>$\rightarrow$<br>LUMO $\beta$ ( $d(\text{Cu1}) = 58\%$ ; $p(\text{Cl2}) = 19\%$ )<br>[15%] | $d \rightarrow d$ ,<br>MLCT |
| 505                               | 517                                | 0.0002         | HOMO $\alpha$ ( $p(\text{N7}) = 20\%$ ; $p(\text{C19}) = 16\%$ ) $\rightarrow$<br>LUMO $\alpha$ ( $p(\text{N6}) = 20\%$ ; $p(\text{C10}) = 17\%$ ) [33%]           | ILCT                        |
| 429                               | 414                                | 0.0021         | HOMO $\beta$ –6 ( $p(\text{Cl2}) = 73\%$ ; $p(\text{Cl3}) = 12\%$ ) $\rightarrow$<br>LUMO $\beta$ ( $d(\text{Cu1}) = 58\%$ ; $p(\text{Cl2}) = 19\%$ )<br>[42%]     | LMCT,<br>ILCT               |
| 416                               | 407                                | 0.0023         | HOMO $\beta$ –4 ( $p(\text{Cl3}) = 70\%$ ; $p(\text{Cl2}) = 10\%$ ) $\rightarrow$<br>LUMO $\beta$ ( $d(\text{Cu1}) = 58\%$ ; $p(\text{Cl2}) = 19\%$ )<br>[11%]     | LMCT,<br>ILCT               |
|                                   | 403                                | 0.0055         | HOMO $\beta$ –5 ( $p(\text{Cl2}) = 82\%$ ) $\rightarrow$<br>LUMO $\beta$ ( $d(\text{Cu1}) = 58\%$ ; $p(\text{Cl2}) = 19\%$ )<br>[24%]                              | LMCT,<br>ILCT               |
|                                   | 392                                | 0.0013         | HOMO $\beta$ –5 ( $p(\text{Cl2}) = 82\%$ ) $\rightarrow$<br>LUMO $\beta$ ( $d(\text{Cu1}) = 58\%$ ; $p(\text{Cl2}) = 19\%$ )<br>[37%]                              | LMCT                        |

<sup>a</sup>In methanol;  $\lambda_{\text{exp}}$  in nm. <sup>b</sup>Calculated at the CAM-B3LYP/6–311++G(d,p)/LanL2DZ(Cu) level of theory in methanol using IEF-PCM solvation model;  $\lambda_{\text{calc}}$  in nm. <sup>c</sup> $f$  – oscillator strength (dimensionless). <sup>d</sup>The main contribution to electronic transition is given in square brackets; the atomic orbital contribution to the given molecular orbital is provided in round brackets.

## 5. Cyclic voltammetry

The electrochemical behavior of complex **17** on a platinum disk working electrode in methanol at an ionic strength of 0.1 mol/dm<sup>3</sup> (Et<sub>4</sub>NClO<sub>4</sub>) was investigated using cyclic voltammetry. Compound **7** itself did not display electrochemical activity on a platinum disk electrode in the potential range from -500 to 750 mV vs. SCE as no oxidation/reduction peaks were found in the voltammogram. However, in the voltammogram of complex **17** (Figure S6, red line) one can find three oxidation peaks at 230, 430, and 545 mV vs. SCE and three reduction peaks at 440, 270, and 115 mV vs. SCE. For comparison purposes, the voltammogram of CuCl<sub>2</sub>·2H<sub>2</sub>O in methanol was also recorded (Figure S6, black line), in which the redox systems Cu(II)/Cu(I) and Cu(I)/Cu(0) in the presence of Cl<sup>-</sup> ions can be attributed to the coupled cathodic/anodic peaks at 470/550 mV and 315/390 mV vs. SCE, respectively. Thus, the cathodic peak at 115 mV vs. SCE and the anodic peak at 230 mV vs. SCE in the voltammogram of complex **17** can be assigned to the [(L3)Cu(II)Cl<sub>2</sub>] / [(L3)Cu(I)Cl<sub>2</sub>] redox couple. This redox system is characterized with a large peak-to-peak separation ( $\Delta E_p = E_{pa} - E_{pc} = 115$  mV) and the peak current ratio much larger than unity ( $i_{pa}/i_{pc} = 7.54$ ). The observed very low cathodic peak current suggests that [(L3)Cu(II)Cl<sub>2</sub>] is involved in the proceeding homogenous chemical reaction which is faster, in the time scale of cyclic voltammetry, than the heterogeneous electron transfer during electroreduction of [(L3)Cu(II)Cl<sub>2</sub>] [18].

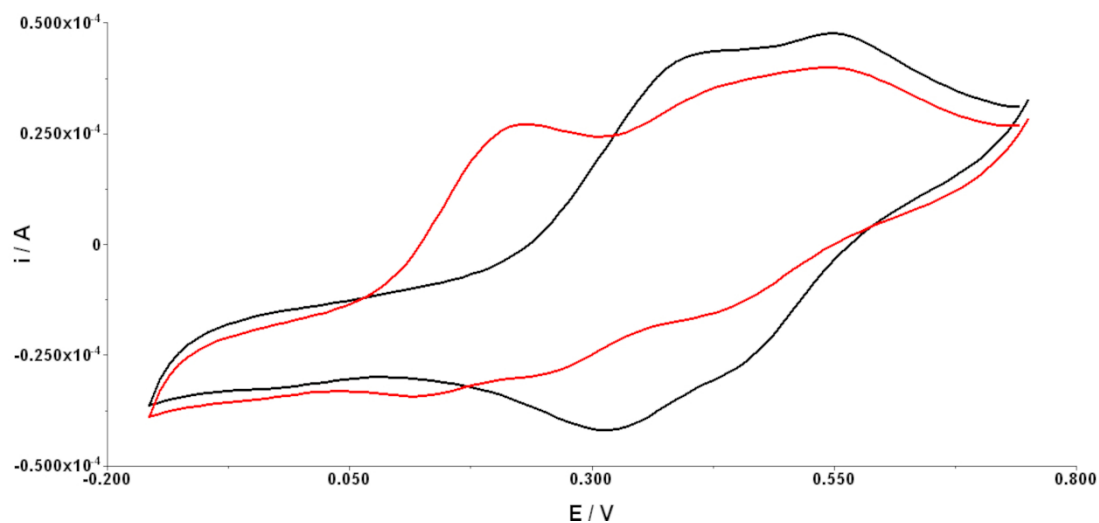

**Figure S6:** Cyclic voltammograms of complex **17** (0.001 mol/dm<sup>3</sup>, red line) and CuCl<sub>2</sub>·2H<sub>2</sub>O (0.001 mol/dm<sup>3</sup>, black line) on a platinum disk working electrode in methanol (0.1 mol/dm<sup>3</sup> Et<sub>4</sub>NClO<sub>4</sub>) at a scan rate of 50 mV s<sup>-1</sup>. Potentials are given vs. SCE.

## 6. References

1. CrysAlis PRO, Agilent Technologies, Yarnton, Oxfordshire, England, **2013**.
2. Sheldrick, G. M., *Acta Cryst.* **2015**, 71, 3-8.  
doi: <https://doi.org/10.1107/S2053229614024218>.
3. Hanwell, M. D., Curtis, D. E., Lonie, D. C., Vandermeersch, T., Zurek, E., Hutchison, G. R. *J. Cheminform.* **2012**, 4, 17, doi: 10.1186/1758-2946-4-17.
4. Merrick, J. P., Moran, D., Radom, L. *J. Phys. Chem. A* **2007**, 111, 11683–11700.  
doi: <https://doi.org/10.1021/jp073974n>.
5. Yanai, T., Tew, D., Handy, N. *Chem. Phys. Lett.* **2004**, 393, 51-57.  
doi: <https://doi.org/10.1016/j.cplett.2004.06.011>.

6. Hay, P. J., Wadt, W. R. *J. Chem. Phys.* **1985**, *82*, 299-310.

doi: <https://doi.org/10.1063/1.448975>.

7. Cancès, M. T., Mennucci, B., Tomasi, J. *J. Chem. Phys.* **1997**, *107*, 3032–3041. doi:

<https://doi.org/10.1063/1.474659>.

8. Gaussian 09, Revision D.01, Frisch, M. J., Trucks, G. W., Schlegel, H. B., Scuseria, G. E., Robb, M. A., Cheeseman, J. R., Scalmani, G., Barone, V., Mennucci, B., Petersson, G. A., Nakatsuji, H., Caricato, M., Li, X., Hratchian, H. P., Izmaylov, A. F., Bloino, J., Zheng, G., Sonnenberg, J. L., Hada, M., Ehara, M., Toyota, K., Fukuda, R., Hasegawa, J., Ishida, M., Nakajima, T., Honda, Y., Kitao, O., Nakai, H., Vreven, T., Montgomery, Jr., J. A., Peralta, J. E., Ogliaro, F., Bearpark, M., Heyd, J. J., Brothers, E., Kudin, K. N., Staroverov, V. N., Keith, T., Kobayashi, R., Normand, J., Raghavachari, K., Rendell, A., Burant, J. C., Iyengar, S. S., Tomasi, J., Cossi, M., Rega, N., Millam, J. M., Klene, M., Knox, J. E., Cross, J. B., Bakken, V., Adamo, C., Jaramillo, J., Gomperts, R., Stratmann, R. E., Yazyev, O., Austin, A. J., Cammi, R., Pomelli, C., Ochterski, J. W., Martin, R. L., Morokuma, K., Zakrzewski, V. G., Voth, G. A., Salvador, P., Dannenberg, J. J., Dapprich, S., Daniels, A. D., Farkas, O., Foresman, J. B., Ortiz, J. V., Cioslowski, J., Fox, D. J. Gaussian, Inc., Wallingford CT, **2013**.

9. Pakulska, W., Malinowski, Z., Szcześniak, A. K., Czarnecka, E., Epsztajn, J. *Arch. Pharm. Chem. Life Sci.* **2009**, *342*, 41–47.

doi: <https://doi.org/10.1002/ardp.200800016>.

10 Addison, A. W., Rao, T. N., Reedijk, J., van Rijn, J., Verschoor, G. C. *J. Chem. Soc., Dalton Trans.*, **1984**, 1349-1356. doi: <https://doi.org/10.1039/DT9840001349>.

11. Steiner, T. *Angew. Chem. Int. Ed.* **2002**, *41*, 48–76.

doi: [https://doi.org/10.1002/1521-3773\(20020104\)41:1%3C48::AID-ANIE48%3E3.0.CO;2-U](https://doi.org/10.1002/1521-3773(20020104)41:1%3C48::AID-ANIE48%3E3.0.CO;2-U).

- 12 Sroczyński, D., Malinowski, Z. *J. Mol. Struct.* **2017**, *1150*, 614–628.  
doi: <https://doi.org/10.1016/j.molstruc.2017.09.020>.
13. Mosalkova, A. P., Voitekhovich, S. V., Lyakhov, A. S., Ivashkevich, L. S., Lach, J., Kersting, B., Gaponik, P. N., Ivashkevich, O. A. *Dalton Trans.* **2013**, *42*, 2985–2997.  
doi: <https://doi.org/10.1039/C2DT32512H>.
14. Mohan, B., Jana, A., Das, N., Bharti, S., Choudhary, M. *J. Mol. Struct.* **2018**, *1171*, 94-109. doi: <https://doi.org/10.1016/j.molstruc.2018.06.016>.
15. Milenković, M., Shcherbakov, I. N., D.Popov, L., Levchenkov, S. I., Borodkin, S. A., Alexandrov, G. G. *Polyhedron* **2017**, *121*, 278-284.  
doi: <https://doi.org/10.1016/j.poly.2016.10.020>.
16. Saito, Y., Takemoto, J., Hutchinson, B., Nakamoto, K. *Inorg. Chem.* **1972**, *11*, 2003-2011. doi: <https://doi.org/10.1021/ic50115a004>.
17. Sharma, A. K., Mukherj, R. *Inorganica Chim. Acta* **2008**, *361*, 2768-2776.  
doi: <https://doi.org/10.1016/j.ica.2008.01.047>.
18. Zanello, P. *Inorganic Electrochemistry: Theory, Practice and Application*, The Royal Society of Chemistry, Cambridge, **2003**, p. 70.
